# Supplementary material for: Structural and Technological Characterization of Tropical Smallholder Farms of Dual-Purpose Cattle in Mexico
Source: MDPI journal article supplement (doi:10.3390/ani10010086), 2020-01-05
Supplement: s1 [file s1]

**Table S1.** Typologies for dual-purpose farms.

| <b>Study</b>                   | <b>Farming classification</b>                                                                                                                                                                                                                              | <b>Author</b> |
|--------------------------------|------------------------------------------------------------------------------------------------------------------------------------------------------------------------------------------------------------------------------------------------------------|---------------|
| Sinaloa, México                | Four types of livestock farms by size; small (67 %), medium (24 %), big (7 %) and big with business potential (2 %).                                                                                                                                       | [29]          |
| Chiapas, Mexico                | Classification by size. Number of heads in the herd                                                                                                                                                                                                        | [7, 31]       |
| Sinaloa, México                | Farms classification by innovation levels: -High (25.6%); -Medium (36.4%); -Low (38%).                                                                                                                                                                     | [25]          |
| South of the State of Mexico   | Classification by level of efficiency: -Group 1: Small and efficient farms; -Group 2: Medium and little efficient farms; -Group 3: Big and extensive farms but little efficient; -Group 4: Subsistence farms.                                              | [13]          |
| Las Choapas, Veracruz, Mexico. | Classification by objectives: -Business farms (3%); -Transition farms (17%); -Traditional farms (80%).                                                                                                                                                     | [25, 27]      |
| Morelos, Mexico                | Classification by number of heads: -Business farms over than 150 heads (7%); -Livestock transition 60 heads (18%); -Familiar agriculture farms 30 to 50 heads (19%); -Familiar livestock 15 to 30 heads (21%); -Livestock subsistence 0 to 15 heads (35%). | [28]          |
| Veracruz, México               | Classification by animal units (UA) per farm: -Traditional 37,97 UA; -Transition 142,7 UA; -Business 177,3 UA.                                                                                                                                             | [30]          |
| Tabasco, Mexico                | Classification by surface (farms): -Cow-calf (55.5%) 56 ha; -Traditional (38.8%) 147 ha; -Improved DP (3.8%) 282 ha; -Sire production (1.9%) 462 ha.                                                                                                       | [6]           |
| Veracruz, Mexico               | Classification by level of production: -Specialized (20 to 27 l/d); -Semispecialized (18 to 20 l/d); -Familiar (6 to 12 l/d); -Dual purpose (3 to 9 l/d).                                                                                                  | [24]          |
| Center of Chiapas, Mexico      | Classification by number of heads and technological level: -Semiextensive 91.8 heads; -Semiintensive 57.7 heads; -Extensive 101.1 heads.                                                                                                                   | [5, 31]       |
| Las Choapas, Veracruz, México  | Classification by size (land): -Traditional group (80 ranches); -Transition group (17 ranches); -Business group (3 ranches).                                                                                                                               | [27]          |
| District 008, Veracruz, Mexico | Classification by technological level and objectives: -Subsistence-traditional; -Commercial traditional; -Semi-technified; -Technified.                                                                                                                    | [3, 30]       |
| Mexico                         | Classification by Region (North, Center, East) and genetic breeds (High, intermediate, low, unknown).                                                                                                                                                      | [8, 26]       |

**Table S2.** Innovations and areas in the dual-purpose system.

| <b>A1. Management</b>     | <b>Information system of management and direct use of resources by grazing</b>        |
|---------------------------|---------------------------------------------------------------------------------------|
| 1. Animal identification  | 0. Individual animals identification was not done; 1. Individual identification was   |
| 2. Record system          | 0. Record systems were not utilized; 1. Record systems were utilized                  |
| 3. Breeding management    | 0. There was not a specific management breeding planning; 1. There was                |
| 4. Grazing native pasture | 0. Cattle did not graze in native pasture lands; 1. Cattle grazed in native pasture   |
| 5. Grazing planting       | 0. Cattle did not graze in planted pasture lands; 1. Cattle grazed in planted pasture |

|                                             |                                                                                                                                           |
|---------------------------------------------|-------------------------------------------------------------------------------------------------------------------------------------------|
| 6. Grazing of crop residues                 | 0. Grazing of crop residues was not done; 1. Grazing of crop residues was done                                                            |
| 7. Milking season                           | 0. Cows are not regularly milked; 1. Cows are regularly milked                                                                            |
| 8. Type of milking                          | 0. Hand milking was utilized; 1. Mechanical milking was utilized mainly                                                                   |
| <b>A2. Feeding</b>                          | <b>Strategies for animal feeding applied by smallholders</b>                                                                              |
| 9. Green fodder                             | 0. Green fodders were not used; 1. Green fodders were cultivated                                                                          |
| 10. Silage                                  | 0. Feeding with silages was not utilized; 1. Feeding with silages was utilized                                                            |
| 11. Hay making                              | 0. Cattle were not fed with haymaking or stubble; 1. Cattle were                                                                          |
| 12. Processed feed                          | 0. Cattle were not fed with processed feed; 1. Cattle were                                                                                |
| 13. Concentrate making                      | 0. Cattle were not fed with concentrate-making feed; 1. Cattle were                                                                       |
| 14. Molasses/urea                           | 0. Cattle were not supplemented with molasses/urea; 1. Cattle were                                                                        |
| 15. Grains and oilseeds                     | 0. Grains and oilseeds were not added to cattle diet; 1. They were added                                                                  |
| 16. Multi nutritional blocks processed      | 0. Cattle were not supplemented with multi nutritional blocks processed; 1. Cattle were supplemented                                      |
| 17. Manufacture of multi nutritional blocks | 0. Cattle were not supplemented with manufactured multi nutritional blocks; 1. Cattle were supplemented                                   |
| 18. Common salt                             | 0. Cattle were not supplemented with NaCl; 1. Cattle were supplemented                                                                    |
| 19. Mineral salts                           | 0. Cattle were not supplemented with mineral salts; 1. Cattle were supplemented                                                           |
| 20. Mineral blocks                          | 0. Cattle were not supplemented with mineral blocks; 1. Cattle were supplemented                                                          |
| 21. Vitamin provided                        | 0. Vitamins were not used; 1. Vitamins were provided, as A, D, E, B complex                                                               |
| 22. Agro-industrial by-products             | 0. Agro-industrial by-products were not used; 1. Agro-industrial by-products were used.                                                   |
| <b>A3. Genetics</b>                         | <b>Technologies to improve productive parameters</b>                                                                                      |
| 23. Using male breeds                       | 0. Male breeds were not utilized; 1. Male breeds were incorporated                                                                        |
| 24. Using male crosses                      | 0. Male crosses were not utilized; 1. Male crosses were incorporated                                                                      |
| 25. Using female breeds                     | 0. Female breeds were not utilized; 1. Female breeds were incorporated                                                                    |
| 26. Using female crosses                    | 0. Female crosses were not utilized; 1. Female crosses were incorporated                                                                  |
| 27. Use of genetically tested bulls         | 0. Genetically tested bulls were not utilized; 1. Genetically tested bulls were utilized                                                  |
| 28. Calves selection criteria               | 0. Calves selection criteria were not used; 1. Calves selection criteria were used                                                        |
| 29. Female selection criteria               | 0. Female selection criteria were not used; 1. Female selection criteria were used                                                        |
| 30. Sire selection criteria                 | 0. Sire selection criteria were not used; 1. Sire selection criteria were used                                                            |
| 31. Crossbred system                        | 0. Crossbreed planning was not utilized; 1. Crossbreed planning was utilized                                                              |
| <b>A4. Reproduction</b>                     | <b>Technologies oriented to improve reproductive efficiency parameters</b>                                                                |
| 32. Evaluation in bulls                     | 0. No evaluation of the reproductive capacity of bulls or no sire on the farm; 1. Evaluation of the reproductive capacity of bull is done |
| 33. Semen evaluation                        | 0. Sperm viability was not done; 1. Sperm fertility was evaluated                                                                         |
| 34. Female evaluation                       | 0. Evaluation of female body condition was not done; 1. Evaluation was done                                                               |
| 35. Oestrus detection,                      | 0. Estrus detection was not done; 1. Estrus detection was done                                                                            |
| 36. Pregnancy Diagnosis                     | 0. Pregnancy diagnosis was not done; 1. Pregnancy diagnosis was done                                                                      |
| 37. Mating                                  | 0. Seasonal mating; 1. Continuous mating was done                                                                                         |
| 38. Breeding policy                         | 0. Control of the mating was not done; 1. Planning mating control                                                                         |
| <b>A5. Animal Health</b>                    | <b>Technologies geared to health, welfare, quality of the milk production</b>                                                             |

---

|                                |                                                                                  |
|--------------------------------|----------------------------------------------------------------------------------|
| 39. Health planning            | 0. Animal health planning was not done; 1. Animal health planning was done.      |
| 40. Vaccination program        | 0. Planning of vaccines and bacterins was not done; 1. Application was done.     |
| 41. Parasite diagnosis         | 0. Diagnosis analysis was not utilized; 1. Diagnosis analysis was used.          |
| 42. Internal deworming control | 0. Internal deworming was not used; 1. Internal deworming was used               |
| 43. External parasite control  | 0. External parasite control was not used; 1. External parasite control was used |
| 44. Mastitis diagnosis         | 0. Mastitis diagnosis was not done; 1. Mastitis diagnosis was done               |
| 45. Sanitary milking program   | 0. A sanitary milking program was not done; 1. Were done                         |

---
